# Supplementary material for: Addition of V-Stage to Conventional TNM Staging to Create the TNVM Staging System for Accurate Prediction of Prognosis in Colon Cancer: A Multi-Institutional Retrospective Cohort Study
Source: MDPI journal article supplement (doi:10.3390/biomedicines9080888), 2021-07-25
Supplement: s1 [file s1]

## Supplementary Material

**Table S1.** Results of multiple logistic regression analysis of the factors related to vascular invasion.

| Variables                | OR (95% CI)         | <i>p</i> -Value |
|--------------------------|---------------------|-----------------|
| T4 tumor                 | 2.516 (1.794–3.527) | <0.001          |
| N stage                  |                     |                 |
| N0                       | Reference           |                 |
| N1                       | 1.106 (0.726–1.684) | 0.639           |
| N2                       | 2.873 (1.893–4.361) | <0.001          |
| Histological grade, poor | 0.955 (0.608–1.498) | 0.840           |
| Lymphatic invasion, yes  | 1.659 (1.145–2.403) | 0.007           |
| Perineural invasion, yes | 1.706 (1.258–2.314) | 0.001           |

OR, odds ratio; CI confidence interval.
